# Supplementary material
Source: ML conference proceedings conference paper supplement (https://openaccess.thecvf.com/content/CVPR_2019/html/Le_SDRSAC_Semidefinite-Based_Randomized_CVPR_2019_paper.html)
Supplement: Supplementary file 1 [file Le_SDRSAC_Semidefinite-Based_Randomized_CVPR_2019_supplemental.pdf]

# SDRSAC: Semidefinite-Based Randomized Approach for Robust Point Cloud Registration without Correspondences Supplementary Material

Huu M. Le<sup>1</sup>, Thanh-Toan Do<sup>2,3</sup>, Tuan Hoang<sup>1</sup>, and Ngai-Man Cheung<sup>1</sup>

<sup>1</sup>Singapore University of Technology and Design <sup>2</sup>University of Liverpool <sup>3</sup>AIOZ Pte Ltd

## 1. Extension of the algorithm to the case of known correspondences

As mentioned in the main paper, our algorithm (SDRSAC) can be extended easily to registration problems with known correspondences. Such extension can be done easily with a slight modification to the original algorithm. In this section, we discuss in details a new algorithm to enable SDRSAC for problems where putative correspondences are known (we call the new algorithm CSDRSAC – SDRSAC with correspondences). Also, we will provide some preliminary experiment results where show that CSDRSAC performs much better than RANSAC [1].

### 1.1. Algorithm

The main idea of the extension is to make use of the information provided by the a priori putative set of correspondences to obtain the subset  $\mathcal{D}'$ , instead of sampling from  $\mathcal{D}$  (Line 5 in the SDRSAC algorithm described in the main paper). Specifically, the algorithm can be described as Alg. 3

### 1.2. Experiments

In this section, we compare CSDRSAC against RANSAC [1]. For input data, we use the Stanford 3D dataset and the UWA datasets. The keypoints were generated and matched using the data and code provided by [?]. For each pair of shapes, a set of  $N = 2000$  putative correspondences are supplied to the algorithms. The number correspondences and run time for five pairs are shown in the Table 1 and the alignment results are displayed in Fig. 1. Note that the number of correspondences are measured based on the original point clouds instead of the feature set. Apparently, CSDRSAC performs much better than RANSAC. This suggest that CSDRSAC is a promising method, which deserves further investigation to develop better randomized algorithm for registration problems with known correspondences.

---

### Algorithm 3 CSDRSAC

---

**Require:** Input data  $\mathcal{S}$  and  $\mathcal{D}$ , `max_iter`, size of sampled subsets  $N_{\text{sample}}$

```

1: iter  $\leftarrow$  0; best_score  $\leftarrow$  0;
2: while iter < max_iter do
3:    $\mathcal{S}' \leftarrow$  Randomly sample from  $\mathcal{S}$  with  $|\mathcal{S}'| = N_{\text{sample}}$ 
4:    $\mathcal{D}' \leftarrow$  Correspondences of  $\mathcal{S}'$  where  $\mathcal{D}' \subseteq \mathcal{D}$ 
5:    $\{\mathcal{M}, \mathbf{R}, \mathbf{t}\} \leftarrow \text{SDRMatching}(\mathcal{S}, \mathcal{D}, \mathcal{S}', \mathcal{D}')$ 
   /*As Alg.2 in main paper */
6:   if  $|\mathcal{M}| > \text{best\_score}$  then
7:     best_score  $\leftarrow |\mathcal{M}|$ ;  $\mathbf{R}^* \leftarrow \mathbf{R}$ ;  $\mathbf{t}^* \leftarrow \mathbf{t}$ 
8:   end if
9:   iter  $\leftarrow$  iter + 1
10:   $T \leftarrow$  Number of iterations that satisfies the stopping criterion.
11:  if iter  $\geq T$  then
12:    return
13:  end if
14: end while
15: return Best transformation( $\mathbf{R}^*, \mathbf{t}^*$ ), best_score
```

---

## 2. More experiments on registration problems without correspondences

In this section, we provide more results for registration problem without correspondences. These experiments were setup with the same settings as described in Section 4 in the main paper. The results are shown in Table 2. As can be seen in Table 2, our method consistently provides comparable results compared to other state-of-the-art methods on point cloud registration without correspondences.

## References

- [1] M. A. Fischler and R. C. Bolles. Random sample consensus: a paradigm for model fitting with applications to image analysis and automated cartography. *Communications of the ACM*, 24(6):381–395, 1981.

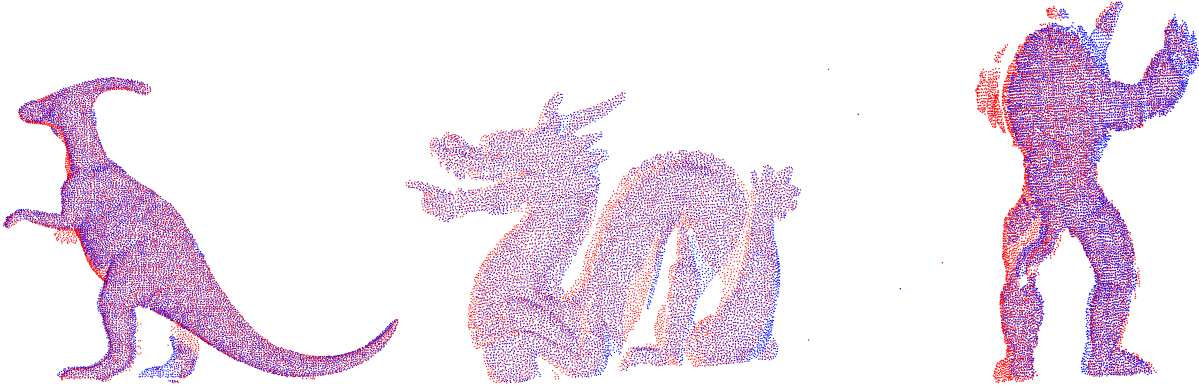

Figure 1. Examples of point clouds aligned by CSDRSAC. From left to right: T-rex; Dragon; Armadillo

|        |          | Bunny       | Armadillo   | Dragon      | Buddha      | Chicken     | T-rex       |
|--------|----------|-------------|-------------|-------------|-------------|-------------|-------------|
| SDRSAC | #Corrs   | <b>6850</b> | <b>6898</b> | <b>6828</b> | <b>6739</b> | <b>7260</b> | <b>6531</b> |
|        | Time (s) | 14.56       | 15.73       | 15.28       | 13.46       | 16.65       | 12.25       |
| RANSAC | #Corrs   | 6530        | 6793        | 6818        | 6695        | 6956        | 6521        |
|        | Time (s) | 195.5       | 420.27      | 153.93      | 445.37      | 156.61      | 352.52      |

Table 1. Experiment results for CSDRSAC and RANSAC. For each pair of input data,  $N = 2000$  key points were used for registration

| Pairs      |         | SDRSAC      | 4PCS  | S-4PCS | ICP  | TrICP | IRLS  | GoICP | TrGoICP |
|------------|---------|-------------|-------|--------|------|-------|-------|-------|---------|
| Office2_1  | #Corrs  | <b>8962</b> | 7644  | 8335   | 8505 | 8615  | 8575  | 953   | 5685    |
| Office2_2  | Time(s) | 10.15       | 10.52 | 10.68  | 4.32 | 5.15  | 11.15 | 40.4  | 35.5    |
| Office2_5  | #Corrs  | <b>5630</b> | 4337  | 4301   | 1887 | 3206  | 4976  | 3813  | 2811    |
| Office2_6  | Time(s) | 8.65        | 10.52 | 10.35  | 4.26 | 4.65  | 12.53 | 30.1  | 28.5    |
| Office2_10 | #Corrs  | <b>5975</b> | 5604  | 5275   | 1881 | 2714  | 2272  | 2840  | 3338    |
| Office2_11 | Time(s) | 7.39        | 10.19 | 10.35  | 4.48 | 5.25  | 22.5  | 29.5  | 28.5    |
| Living2_20 | #Corrs  | <b>3787</b> | 3662  | 3347   | 2227 | 2368  | 2267  | 1990  | 3300    |
| Living2_21 | Time(s) | 8.65        | 10.25 | 10.12  | 4.65 | 4.13  | 4.45  | 32.5  | 29.3    |
| Living2_5  | #Corrs  | <b>3862</b> | 3523  | 3545   | 1358 | 1456  | 1286  | 1618  | 2553    |
| Living2_6  | Time(s) | 6.8         | 10.25 | 10.65  | 4.35 | 4.56  | 8.78  | 33.5  | 30.2    |
| Living2_47 | #Corrs  | <b>2892</b> | 2788  | 2392   | 587  | 614   | 374   | 379   | 1688    |
| Living2_48 | Time(s) | 11.85       | 15.95 | 15.23  | 4.56 | 4.67  | 29.75 | 39.5  | 42.6    |

Table 2. Results for real data experiments. For each pairs, the first row is the number of correspondences (#Corrs) and the second row shows the run time in second. Note that S-4PCS represent Super4PCS
